# Supplementary material
Source: publisher figshare collection journal article supplement (https://wiley.figshare.com/articles/dataset/_/3563439)
Supplement: Supplementary file 1 [file 1 › appendix-B.htm]

Ecological Archives E096-267-A2


*Ecological Archives* E096-267-A2

Ewan D. Wakefield, Ian R. Cleasby, Stuart Bearhop, Thomas W. Bodey, Rachel D. Davies, Peter I. Miller, Jason Newton, Stephen C. Votier, Keith C. Hamer. 2015. Long-term individual foraging site fidelity—why some gannets don't change their spots. *Ecology* 96:3058–3074. http://dx.doi.org/10.1890/14-1300.1

Appendix B. Additional description of the methods used to determine gannet tissue and environmental baseline stable isotope ratios.

> View / download PDF.


---

[Back to E096-267]
